# Supplementary material for: Knockdown of CPEB1 and CPEB4 Inhibits Scar Formation via Modulation of TAK1 and SMAD Signaling
Source: PubMed Central journal article supplement — Ann Dermatol. 2023 Jul 24;35(4):293–302. doi: 10.5021/ad.22.210 (PMC10407338; doi:10.5021/ad.22.210), 2023-07-24
Supplement: ad-35-293-s001.pdf [file ad-35-293-s001.pdf]

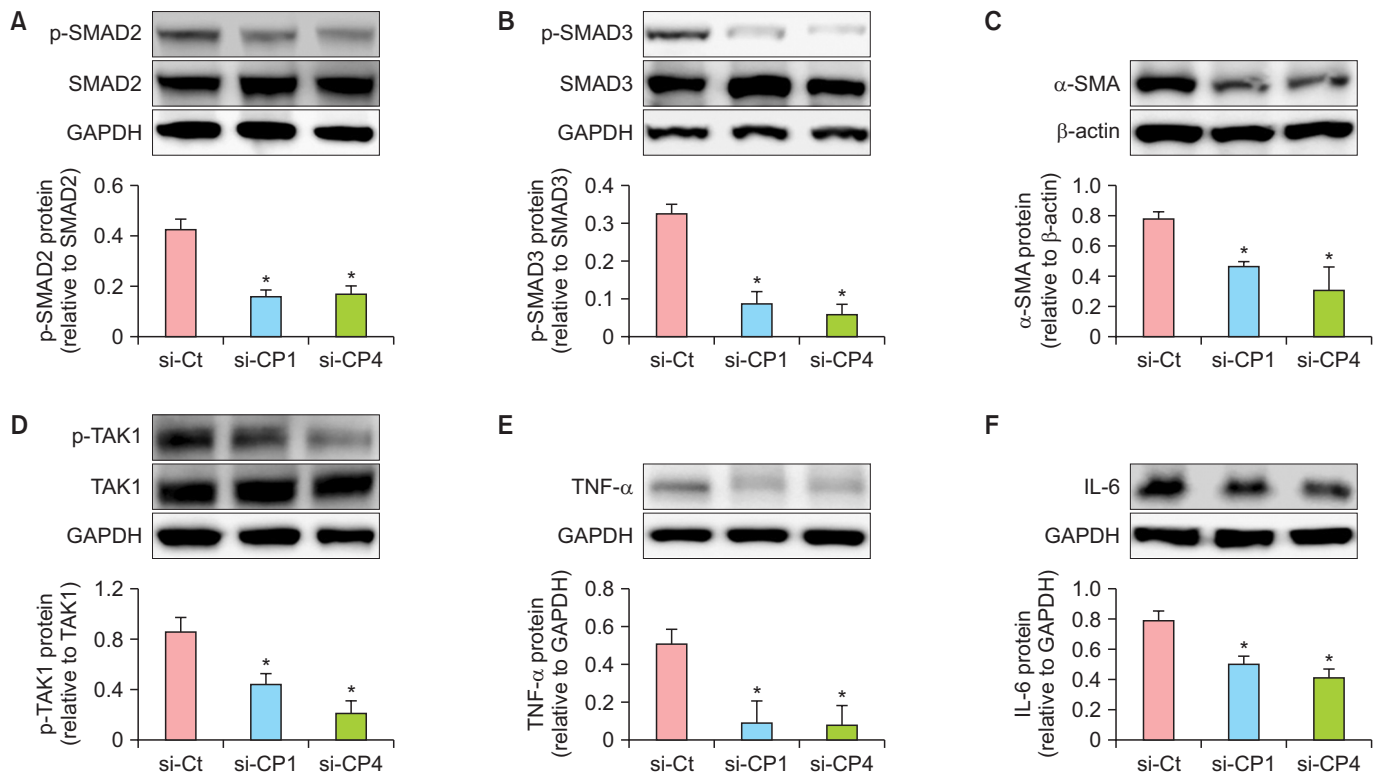

**Supplementary Fig. 1.** Treatment with si-CP1 or si-CP4 decreased inflammation-related signaling and fibrosis-related signaling in the mouse model of P.U. Protein expression was measured by western blot analysis on day 10 after wound creation. (A) CPEB1 or CPEB4 siRNA decreased phosphorylation of SMAD2 in wound tissues compared to si-Ct. (B) CPEB1 or CPEB4 siRNA decreased phosphorylation of SMAD3 in wound tissues compared to si-Ct. (C) CPEB1 or CPEB4 siRNA decreased expression of  $\alpha$ -SMA in wound tissues compared to si-Ct. (D) CPEB1 or CPEB4 siRNA decreased phosphorylation of TAK1 in wound tissues compared to si-Ct. (E) CPEB1 or CPEB4 siRNA decreased expression of TNF- $\alpha$  in wound tissues compared to si-Ct. (F) CPEB1 or CPEB4 siRNA decreased expression of IL-6 in wound tissues compared to si-Ct. Data are expressed as mean  $\pm$  standard error (n=10). si-Ct: negative control siRNA, si-CP1: CPEB1 siRNA, si-CP4: CPEB4 siRNA, P.U.: pressure ulcer. \* $p < 0.05$  for comparison with si-Ct.
