# Supplementary material for: Knockdown of CPEB1 and CPEB4 Inhibits Scar Formation via Modulation of TAK1 and SMAD Signaling
Source: PubMed Central journal article supplement — Ann Dermatol. 2023 Jul 24;35(4):293–302. doi: 10.5021/ad.22.210 (PMC10407338; doi:10.5021/ad.22.210), 2023-07-24
Supplement: ad-35-293-s002.pdf [file ad-35-293-s002.pdf]

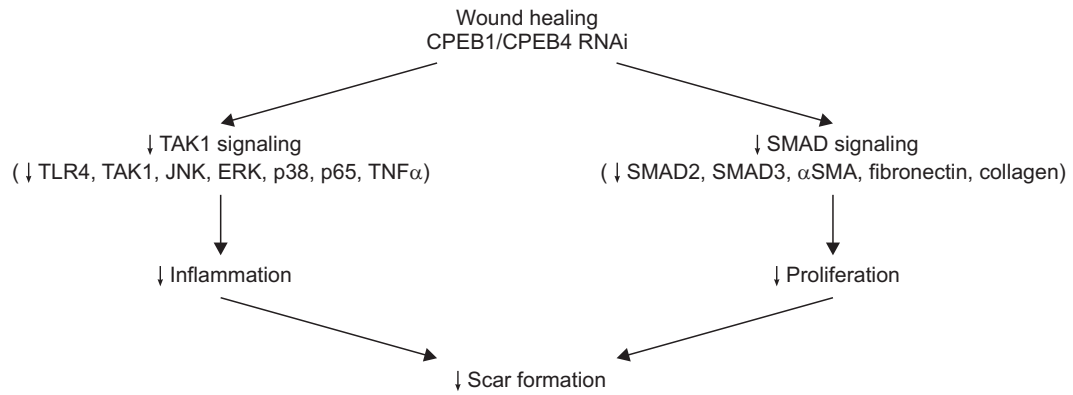

**Supplementary Fig. 2.** Overview the effects of treatment with si-CPEB1 or si-CPEB4 on wound healing in an mice model of pressure ulcers. si-CPEB: siRNA targeted to cytoplasmic polyadenylation element binding protein.
